# Supplementary material for: Low molecular weight heparin-based reduction-sensitive nanoparticles for antitumor and anti-metastasis of orthotopic breast cancer
Source: Royal Society of Chemistry journal article supplement (doi:10.1039/c8bm00486b), 2018-01-01
Supplement: c8bm00486b1.pdf [file c8bm00486b1.pdf]

**Low molecular weight heparin-based reduction-sensitive nanoparticles for  
antitumor and anti-metastasis of orthotopic breast cancer**

Haifeng Sun, Dinglingge Cao, Yanhong Liu, Hui Wang, Xue Ke\*, Tianyuan Ci\*

*Department of Pharmaceutics, State Key Laboratory of Natural Medicines, China  
Pharmaceutical University, 24 Tongjiaxiang, Nanjing 210009, China*

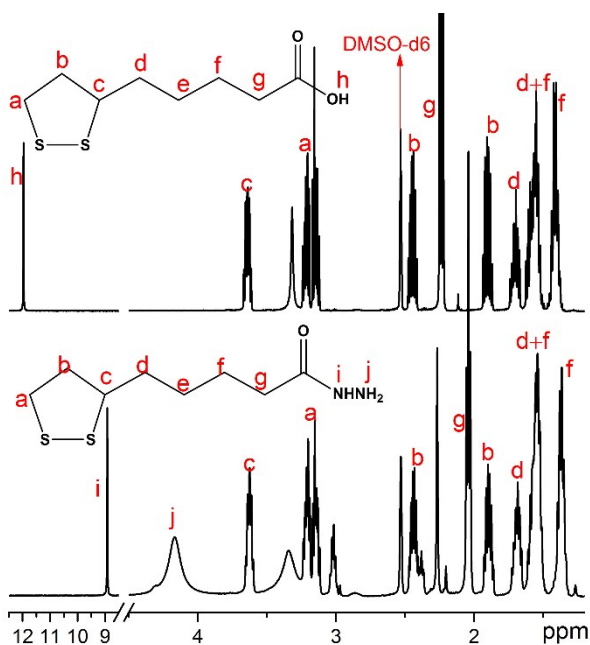

**Fig. S1**  $^1\text{H}$  NMR spectra of LA and LA-hydraizide.

The structure was characterized by  $^1\text{H}$  NMR (500 MHz,  $\text{DMSO-d}_6$ ):  $\delta$  (ppm) = 8.92 (s, 1H,  $-\text{C}(=\text{O})\text{NHNH}_2$ ), 4.17 (br, 2H,  $-\text{C}(=\text{O})\text{NHNH}_2$ ), 3.60-3.65 (m, 1H,  $-\text{SSCH}_2-$ ), 3.12-3.24 (m, 2H,  $-\text{SSCH}_2\text{CH}_2-$ ), 2.38-2.46 (m, 1H,  $-\text{SSCH}_2\text{CH}_2-$ ), 2.03-2.06 (m, 2H,  $-\text{CH}_2\text{C}(=\text{O})\text{NH}-$ ), 1.86-1.98 (m, 1H,  $-\text{SSCH}_2\text{CH}_2-$ ), 1.51-1.73 (m, 4H,  $-\text{CH}_2\text{CH}_2\text{CH}_2\text{CH}_2\text{C}(=\text{O})\text{NH}-$ ), 1.34-1.39 (m, 2H,  $-\text{CH}_2\text{CH}_2\text{CH}_2\text{CH}_2\text{C}(=\text{O})\text{NH}-$ ).

\* Corresponding authors. Tel: +86-25-8327-1035; Fax: +86-25-8327-1269;

E-mail address: [citianyuan\\_cpu@163.com](mailto:citianyuan_cpu@163.com) (T.Y. Ci); [kexue1973@vip.sina.com](mailto:kexue1973@vip.sina.com) (X. Ke)

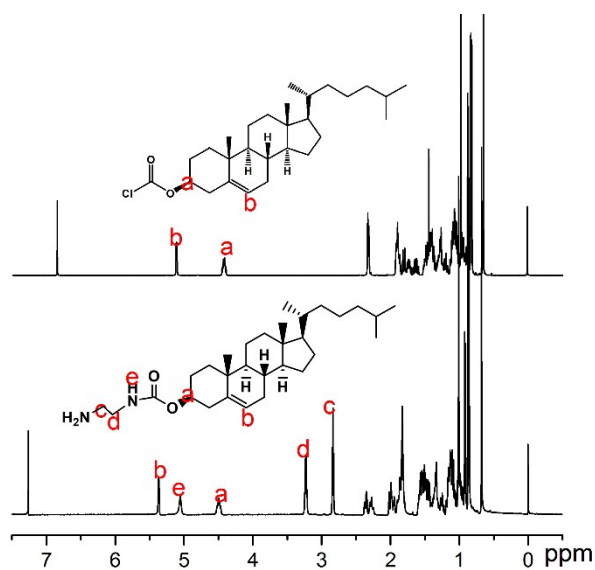

**Fig. S2** <sup>1</sup>H NMR spectra of Chol and Chol-eda.

The Chol-eda was confirmed by <sup>1</sup>H NMR in CDCl<sub>3</sub> (500 MHz, CDCl<sub>3</sub>): δ (ppm) 2.85 (t, 2H, NH<sub>2</sub>CH<sub>2</sub>CH<sub>2</sub>-), 3.24 (q, 2H, -NHCH<sub>2</sub>CH<sub>2</sub>-), 4.50 (s, 1H, -CH(CH<sub>2</sub>)<sub>2</sub>), 5.05 (s, 1H, -C(=O)NH-), 5.36 (s, 1H, CH<sub>2</sub>CH=).

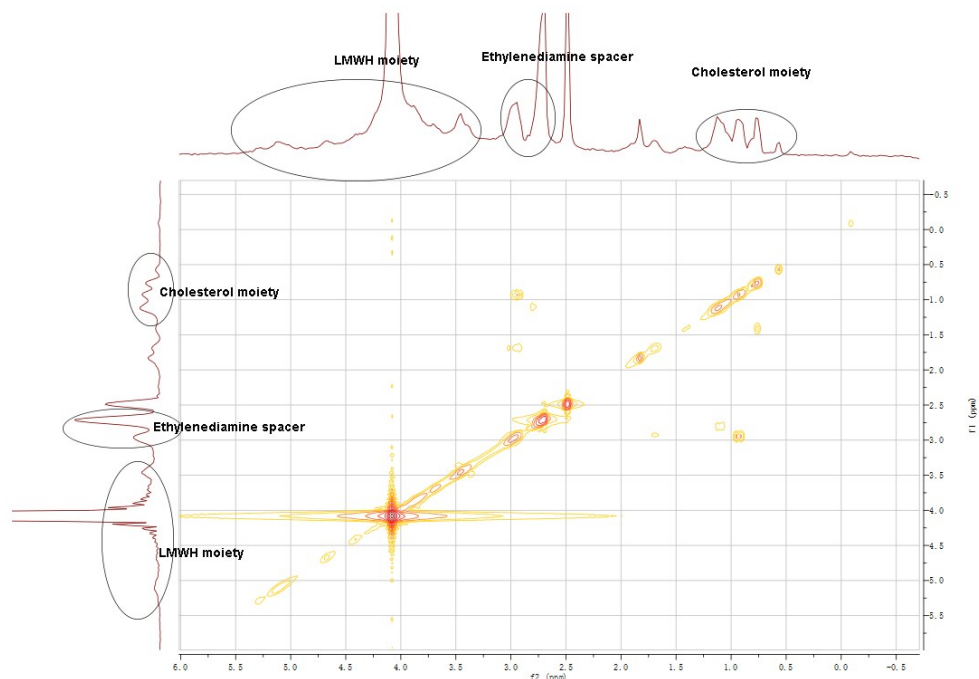

**Fig. S3** <sup>1</sup>H-<sup>1</sup>H COSY spectrum of LHC<sub>2</sub>

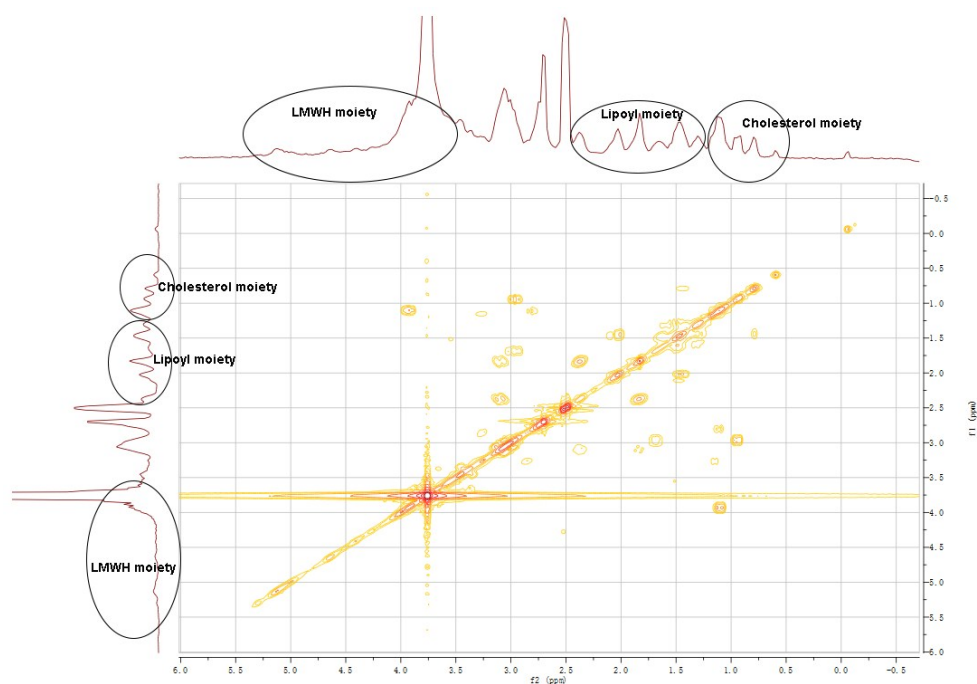

**Fig. S4**  $^1\text{H}$ - $^1\text{H}$  COSY spectrum of LLHC<sub>2</sub>

The Cholesterol modified LMWH was confirmed by the characteristic peaks of the methyl protons in Chol-eda at 0.57-1.13 ppm. Additionally, ethylenediamine spacer also appeared at 2.73-2.89 ppm, indicating the successful conjugation of Chol-eda to LMWH (**Fig. S3**). For LLHC<sub>2</sub> polymer, the characteristic peaks of lipoyl moiety protons appeared at 1.30, 1.47, 1.69, 1.83, 2.03 and 1.83 ppm and the peaks at 0.59-1.17 ppm of Chol-eda protons also emerged (**Fig. S4**). These results indicate that LMWH has been successfully conjugated to cholesterol and lipoic acid.

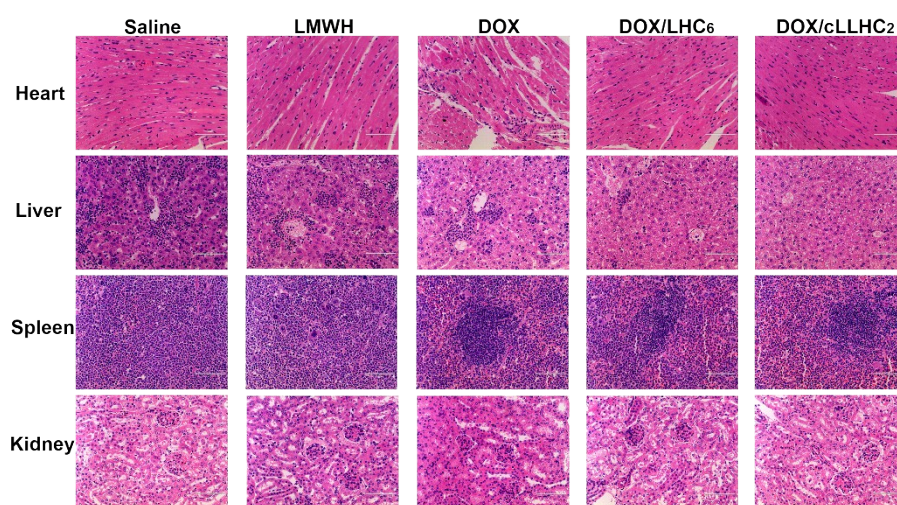

**Fig. S5** H&E analysis of heart, liver, spleen and kidney tissues from mice treated with

the different formulations. Scale bar reads 400  $\mu\text{m}$ .

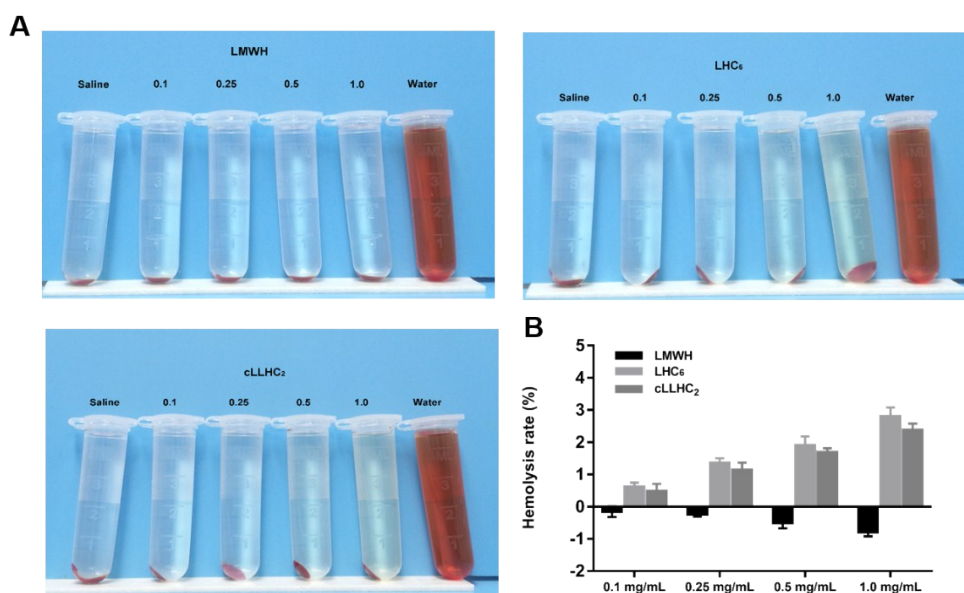

**Fig. S6** (A) Images of the hemolysis of red blood cells treated with different polymers after centrifugation; (B) The hemolysis of different groups at different concentrations ( $n = 3$ ).

**Table S1** Summary of pharmacokinetic parameters for DOX, DOX/LHC<sub>6</sub> and DOX/cLLHC<sub>2</sub>

| Parameters                                             | DOX             | DOX/LHC <sub>6</sub> | DOX/cLLHC <sub>2</sub> |
|--------------------------------------------------------|-----------------|----------------------|------------------------|
| AUC <sub>0-1</sub> ( $\mu\text{g/mL} \cdot \text{h}$ ) | 2.35 $\pm$ 0.18 | 61.42 $\pm$ 8.93**   | 78.57 $\pm$ 15.77**    |
| t <sub>1/2<math>\alpha</math></sub> (h)                | 0.28 $\pm$ 0.04 | 0.58 $\pm$ 0.05**    | 0.57 $\pm$ 0.08**      |
| t <sub>1/2<math>\beta</math></sub> (h)                 | 3.60 $\pm$ 1.28 | 7.43 $\pm$ 0.68*     | 11.63 $\pm$ 4.10*      |
| CL (L/h/kg)                                            | 1.70 $\pm$ 0.03 | 0.08 $\pm$ 0.01**    | 0.06 $\pm$ 0.01**      |
| K <sub>10</sub> (1/h)                                  | 0.91 $\pm$ 0.17 | 0.60 $\pm$ 0.03*     | 0.57 $\pm$ 0.10*       |
| K <sub>12</sub> (1/h)                                  | 1.42 $\pm$ 0.84 | 0.39 $\pm$ 0.34      | 0.60 $\pm$ 0.24        |
| K <sub>21</sub> (1/h)                                  | 0.64 $\pm$ 0.21 | 0.16 $\pm$ 0.01*     | 0.13 $\pm$ 0.002*      |

\* $p < 0.05$  vs free DOX, \*\* $p < 0.01$  vs free DOX,  $n = 3$ .
